# Supplementary material for: Mitigation of salt stress in Sorghum bicolor L. by the halotolerant endophyte Pseudomonas stutzeri ISE12
Source: Front Plant Sci. 2024 Sep 23;15:1458540. doi: 10.3389/fpls.2024.1458540 (PMC11456471; doi:10.3389/fpls.2024.1458540)
Supplement: Supplementary file 3 [file Table3.docx]

**Supplementary Table 3.** Effect of salinity (0, 100, 150 and 200 mM NaCl concentration), sorghum genotypes (Pegah and Payam) and inoculation with *Pseudomonas stutzeri* ISE12 on different parameters in pot experiment.

|  |  |  |  |  |  |  | **SALT LEVELS mM NaCl** | | | |  |
| --- | --- | --- | --- | --- | --- | --- | --- | --- | --- | --- | --- |
|  | **Trait** |  | **GENOTYPE** | **INOCULATION** |  | **0** | | **100** | **150** | **200** | | |
|  |  |  |  | NI |  | 5.1 b | | 4.9 bc | 4.3 d | 4.2 de | | |
|  |  |  | Pegah | PS |  | 5.7 a | | 5.0 b | 4.9 bc | 4.5 cd | | |
|  | NOL |  |  | Changes (%) |  | (+12) | | (+2) | (+14) | (+7) | | |
|  |  |  |  | NI |  | 5.0 b | | 4.5 cd | 4.2 de | 3.8 e | | |
|  |  |  | Payam | PS |  | 5.6 a | | 4.8 bc | 4.5 cd | 4.3 d | | |
|  |  |  |  | Changes (%) |  | (+12) | | (+7) | (+7) | (+13) | | |
|  |  |  |  | NI |  | 29.5 a | | 25.2 b | 21.2 de | 18.3 f | | |
|  |  |  | Pegah | PS |  | 29.9 a | | 28.2 a | 25.6 b | 22.7 de | | |
|  | SL |  |  | Changes (%) |  | (+2) | | (+12) | (+21) | (+24) | | |
|  |  |  |  | NI |  | 22.8 cd | | 18.0 f | 14.5 g | 11.6 h | | |
|  |  |  | Payam | PS |  | 24.6 bc | | 22.9 cd | 20.8 e | 17.8 f | | |
|  |  |  |  | Changes (%) |  | (+8) | | (+27) | (+43) | (+53) | | |
|  |  |  |  | NI |  | 18.8 d | | 14.7 fgh | 13.2 hij | 10.7 kl | | |
|  |  |  | Pegah | PS |  | 30.6 a | | 21.2 c | 15.5 efg | 13.7 ghi | | |
|  | RL |  |  | Changes (%) |  | (+63) | | (+44) | (+18) | (+28) | | |
|  |  |  |  | NI |  | 17.4 de | | 12.3 ijk | 8.4 m | 6.5 n | | |
|  |  |  | Payam | PS |  | 23.5 b | | 16.6 ef | 11.6 jk | 9.6 lm | | |
|  |  |  |  | Changes (%) |  | (+35) | | (+35) | (+38) | (+48) | | |
|  |  |  |  | NI |  | 63.4 a | | 48.7 cd | 41.8 ef | 29.1 hi | | |
|  |  |  | Pegah | PS |  | 68.3 a | | 55.9 b | 46.9 cde | 36.5 fg | | |
|  | LA |  |  | Changes (%) |  | (+8) | | (+15) | (+12) | (+25) | | |
|  |  |  |  | NI |  | 47.2 cde | | 37.6 fg | 25.9 i | 15.8 j | | |
|  |  |  | Payam | PS |  | 51.4 bc | | 43.7 de | 34.1 gh | 24.7 i | | |
|  |  |  |  | Changes (%) |  | (+9) | | (+16) | (+32) | (+56) | | |
|  |  |  | Pegah | NI |  | 0.540 b | | 0.395 d | 0.290 gh | 0.172 l | | |
|  |  |  |  | PS |  | 0.639 a | | 0.474 c | 0.337 ef | 0.247 ij | | |
|  | SFW |  |  | Changes (%) |  | (+18) | | (+20) | (+16) | (+44) | | |
|  |  |  | Payam | NI |  | 0.361 de | | 0.256 hi | 0.155 l | 0.108 m | | |
|  |  |  |  | PS |  | 0.439 c | | 0.310 fg | 0.217 jk | 0.193 kl | | |
|  |  |  |  | Changes (%) |  | (+22) | | (+21) | (+40) | (+79) | | |
|  |  |  | Pegah | NI |  | 0.057 b | | 0.043 de | 0.031 hi | 0.020 lm | | |
|  |  |  |  | PS |  | 0.067 a | | 0.050 c | 0.036 fg | 0.026 jk | | |
|  | SDW |  |  | Changes (%) |  | (+18) | | (+16) | (+16) | (+30) | | |
|  |  |  | Payam | NI |  | 0.039 ef | | 0.028 ij | 0.018 m | 0.010 n | | |
|  |  |  |  | PS |  | 0.047 cd | | 0.034 gh | 0.024 jkl | 0.023 kl | | |
|  |  |  |  | Changes (%) |  | (+21) | | (+21) | (+33) | (+130) | | |
|  |  |  |  | NI |  | 0.130 c | | 0.085 efg | 0.073 ghi | 0.042 kl | | |
|  |  |  | Pegah | PS |  | 0.201 a | | 0.115 cd | 0.102 de | 0.062 h-k | | |
|  | RFW |  |  | Changes (%) |  | (+55) | | (+35) | (+40) | (+48) | | |
|  |  |  |  | NI |  | 0.079 fgh | | 0.066 g-j | 0.034 lm | 0.019 m | | |
|  |  |  | Payam | PS |  | 0.154 b | | 0.094 ef | 0.055 i-l | 0.048 jkl | | |
|  |  |  |  | Changes (%) |  | (+95) | | (+42) | (+62) | (+153) | | |
|  |  |  |  | NI |  | 0.015 c | | 0.010 f | 0.008 gh | 0.004 lm | | |
|  |  |  | Pegah | PS |  | 0.021 a | | 0.013 d | 0.012 de | 0.007 ij | | |
|  | RDW |  |  | Changes (%) |  | (+40) | | (+30) | (+50) | (+75) | | |
|  |  |  |  | NI |  | 0.009 fg | | 0.007 hi | 0.004 m | 0.002 n | | |
|  |  |  | Payam | PS |  | 0.017 b | | 0.011 e | 0.006 jk | 0.005 kl | | |
|  |  |  |  | Changes (%) |  | (+89) | | (+57) | (+50) | (+150) | | |
|  |  |  |  | NI |  | 370 b | | 201 de | 113 g-f | 50 ijk | | |
|  |  |  | Pegah | PS |  | 445 a | | 289 c | 156 efg | 81 h-k | | |
|  | SLA |  |  | Changes (%) |  | (+20) | | (+44) | (+38) | (+62) | | |
|  |  |  |  | NI |  | 174 def | | 93 g-j | 40 jk | 17 k | | |
|  |  |  | Payam | PS |  | 228 cd | | 136 g-f | 69 h-k | 35 jk | | |
|  |  |  |  | Changes (%) |  | (+31) | | (+46) | (+72) | (+105) | | |
|  |  |  |  |  |  |  | |  |  |  | | |
|  |  |  |  |  |  |  | |  |  |  | | |
|  |  |  |  |  |  |  | |  |  |  | | |
|  |  |  |  | NI |  | 0.243 a | | 0.236 ab | 0.228 ab | 0.240 a | | |
|  |  |  | Pegah | PS |  | 0.244 a | | 0.249 a | 0.227 ab | 0.237 ab | | |
|  | LWR |  |  | Changes (%) |  | (+0.4) | | (+5) | (-0.4) | (-1) | | |
|  |  |  |  | NI |  | 0.231 ab | | 0.234 ab | 0.243 a | 0.215 b | | |
|  |  |  | Payam | PS |  | 0.243 a | | 0.226 ab | 0.244 a | 0.242 a | | |
|  |  |  |  | Changes (%) |  | (+5) | | (-3) | (+0.4) | (+12) | | |
|  |  |  |  | NI |  | 0.269 b | | 0.233 b | 0.267 b | 0.237 b | | |
|  |  |  | Pegah | PS |  | 0.328 a | | 0.264 b | 0.333 a | 0.264 b | | |
|  | RWR |  |  | Changes (%) |  | (+22) | | (+13) | (+25) | (+11) | | |
|  |  |  |  | NI |  | 0.237 b | | 0.263 b | 0.245 b | 0.254 b | | |
|  |  |  | Payam | PS |  | 0.353 a | | 0.338 a | 0.254 b | 0.250 b | | |
|  |  |  |  | Changes (%) |  | (+49) | | (+28) | (+4) | (-1) | | |
|  |  |  |  | NI |  | 5.95 ij | | 8.59 e | 9.62 d | 10.2 c | | |
|  |  |  | Pegah | PS |  | 5.78 j | | 7.42 e | 7.09 fg | 6.64 h | | |
|  | SH2O2 |  |  | Changes (%) |  | (-3) | | (-14) | (-26) | (-35) | | |
|  |  |  |  | NI |  | 6.80 gh | | 10.4 c | 11.9 b | 13.1 a | | |
|  |  |  | Payam | PS |  | 6.21 i | | 8.41 e | 8.21 e | 7.32 f | | |
|  |  |  |  | Changes (%) |  | (-9) | | (-19) | (-31) | (-44) | | |
|  |  |  |  | NI |  | 5.70 jk | | 7.78 ef | 8.73 cd | 9.31 c | | |
|  |  |  | Pegah | PS |  | 5.49 k | | 7.04 fgh | 6.82 hi | 6.66 hi | | |
|  | RH2O2 |  |  | Changes (%) |  | (-4) | | (-10) | (-22) | (-28) | | |
|  |  |  |  | NI |  | 6.46 hij | | 9.39 c | 10.6 b | 11.5 a | | |
|  |  |  | Payam | PS |  | 6.15 ijk | | 8.14 de | 7.65 efg | 6.87 ghi | | |
|  |  |  |  | Changes (%) |  | (-5) | | (-13) | (-28) | (-40) | | |
|  |  |  |  | NI |  | 2.36 i | | 3.93 e | 5.69 b | 7.29 a | | |
|  |  |  | Pegah | PS |  | 2.22 ij | | 3.07 g | 4.14 d | 5.78 b | | |
|  | SPOD |  |  | Changes (%) |  | (-6) | | (-22) | (-27) | (-21) | | |
|  |  |  |  | NI |  | 2.31 i | | 3.54 f | 4.68 c | 5.82 b | | |
|  |  |  | Payam | PS |  | 2.11 j | | 2.87 h | 3.61 f | 4.05 de | | |
|  |  |  |  | Changes (%) |  | (-9) | | (-19) | (-23) | (-30) | | |
|  |  |  |  | NI |  | 4.02 j | | 6.89 g | 14.7 c | 21.89 a | | |
|  |  |  | Pegah | PS |  | 3.38 k | | 5.66 h | 9.52 e | 11.58 d | | |
|  | RPOD |  |  | Changes (%) |  | (-16) | | (-18) | (-35) | (-47) | | |
|  |  |  |  | NI |  | 3.94 j | | 7.75 f | 11.81 d | 18.57 b | | |
|  |  |  | Payam | PS |  | 3.15 k | | 4.92 i | 6.86 g | 9.80 e | | |
|  |  |  |  | Changes (%) |  | (-20) | | (-37) | (-42) | (-48) | | |
|  |  |  |  | NI |  | 11.65 j | | 18.46 e | 25.77 b | 27.42 a | | |
|  |  |  | Pegah | PS |  | 10.54 k | | 14.67 g | 17.66 f | 17.80 ef | | |
|  | SP |  |  | Changes (%) |  | (-10) | | (-21) | (-31) | (-35) | | |
|  |  |  |  | NI |  | 10.44 k | | 15.23 g | 20.22 d | 22.81 c | | |
|  |  |  | Payam | PS |  | 9.13 l | | 11.10 jk | 13.55 h | 12.54 i | | |
|  |  |  |  | Changes (%) |  | (-13) | | (-27) | (-33) | (-45) | | |
|  |  |  |  | NI |  | 7.84 fgh | | 9.55 c | 11.26 b | 12.37 a | | |
|  |  |  | Pegah | PS |  | 7.54 gh | | 8.76 de | 9.59 c | 10.80 b | | |
|  | RP |  |  | Changes (%) |  | (-4) | | (-8) | (-15) | (-13) | | |
|  |  |  |  | NI |  | 6.60 j | | 7.28 hi | 8.40 ef | 9.32 cd | | |
|  |  |  | Payam | PS |  | 6.17 j | | 6.69 ij | 7.36 ghi | 8.02 fg | | |
|  |  |  |  | Changes (%) |  | (-7) | | (-8) | (-12) | (-14) | | |

NI – non inoculated control, PS – variant inoculated by *Pseudomonas stutzeri* ISE12. NOL= Number of leaves; SL= shoot length (cm); RL= root length (cm); LA= leaf area (cm2); SFW= shoot Fresh weight (g); RFW= root fresh weight (g); SDW= soot dry weight (g); RDW= root dry weight (g); SLA= specific leaf area (cm2/g) ; LWR= leaf weight ratio; RWR= root weight ratio; SH2O2= shoot H2O2 concentration (µmol/g FW); RH2O2= root H2O2 concentration (µmol/g FW); SPOD= shoot peroxidase enzyme activity (U/mg protein); RPOD= root peroxidase enzyme activity (U/mg protein); SP= shoot proline concentration (nmol/g FW); RP= root proline concentration (nmol/g FW). Values within a group in each trait bearing different superscripts are significantly different at p ≤ 0.05. The numbers in Parentheses represent the percentage of changes compare to NI control.
